# Supplementary figures and images for: Reappraisal of prognostic factors used in the European Pediatric Soft Tissue Sarcoma Study Group RMS 2005 study for localized rhabdomyosarcoma to optimize risk stratification and generate a prognostic nomogram
Source: PubMed Central journal article supplement — Cancer. 2024 Feb 24;130(13):2351–60. doi: 10.1002/cncr.35258 (PMC11497283; doi:10.1002/cncr.35258), 2024-02-24

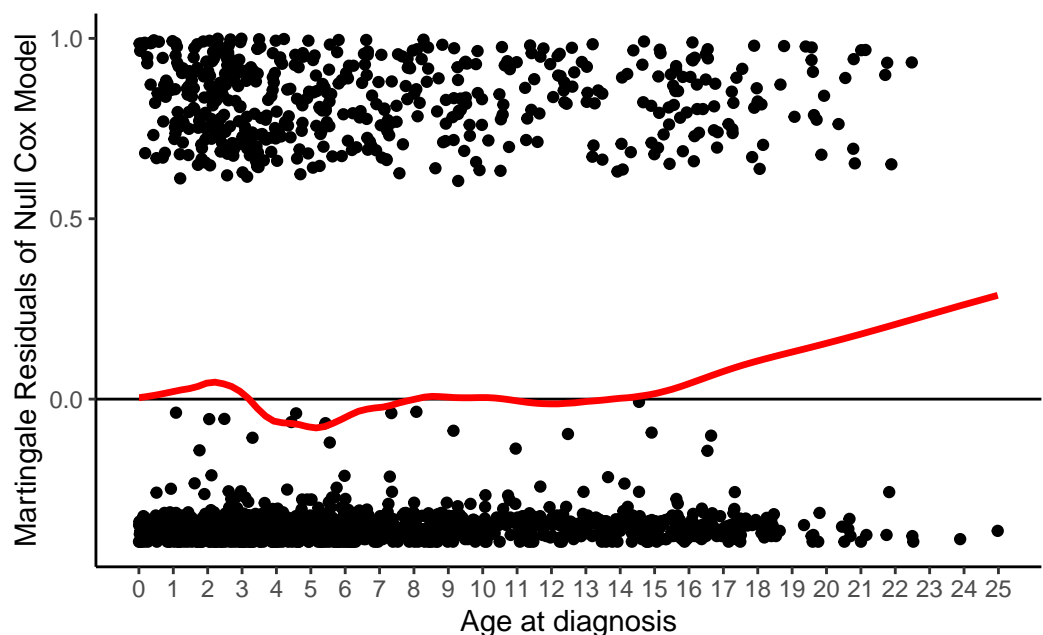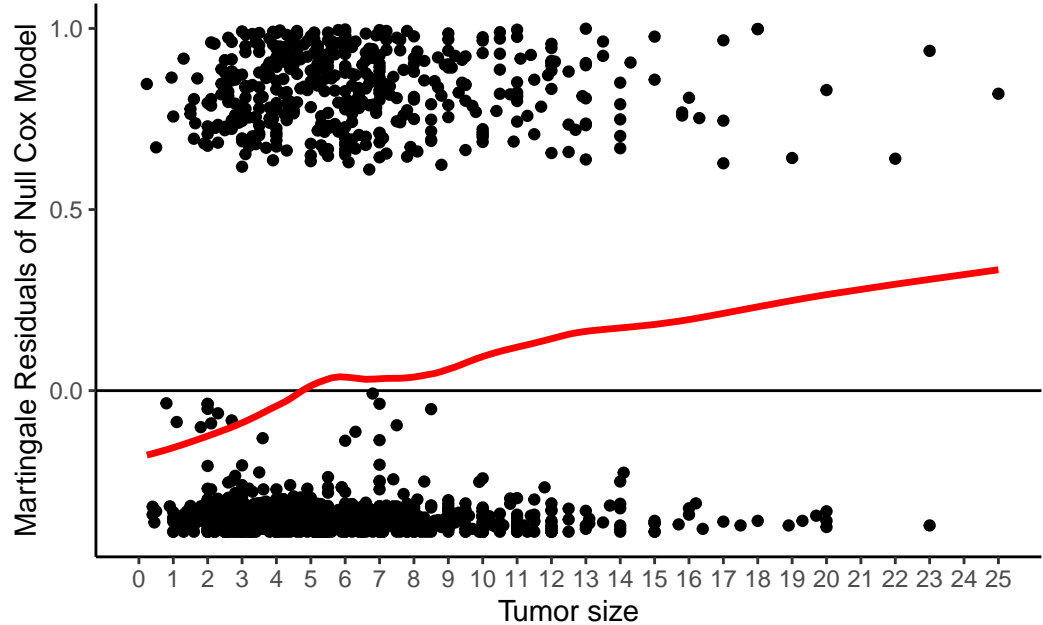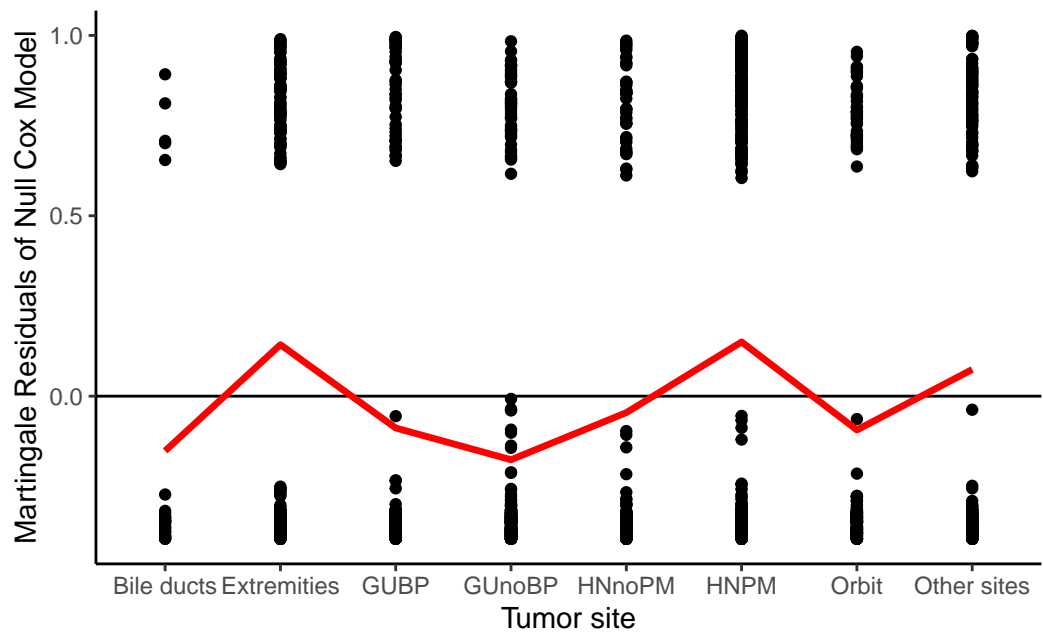

Supplement: CNCR-130-2351-s001.pdf [file CNCR-130-2351-s001.pdf]

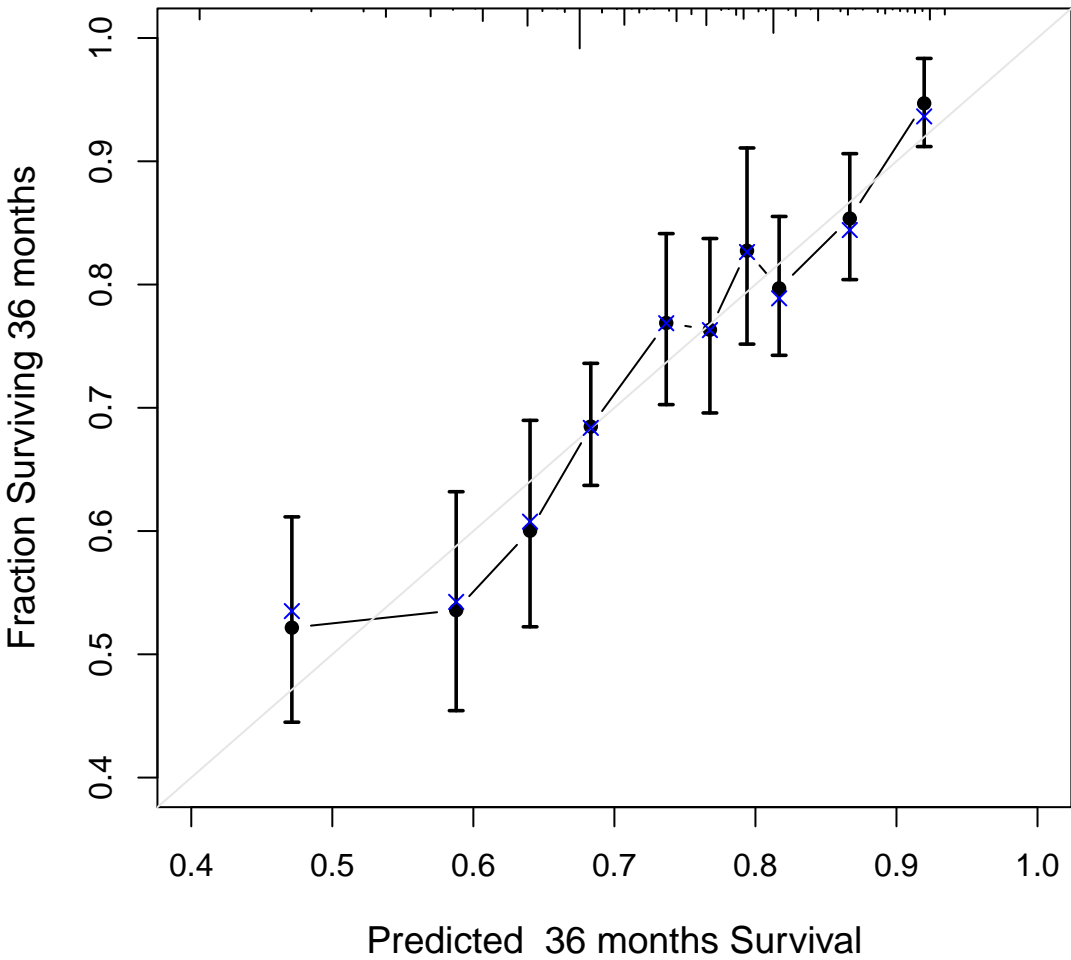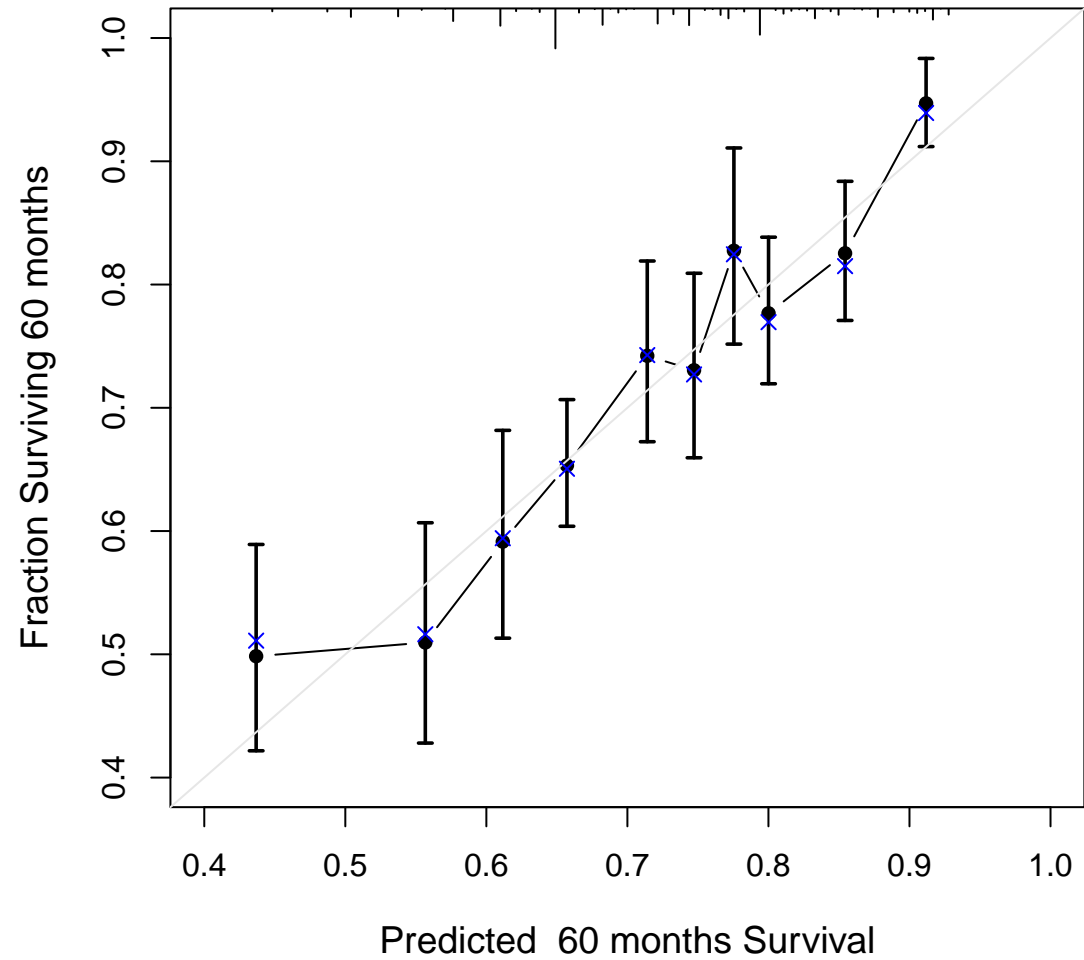

Supplement: CNCR-130-2351-s003.pdf [file CNCR-130-2351-s003.pdf]
